# Supplementary material for: Influence of lattice water molecules on the magnetization dynamics of binuclear dysprosium(iii) compounds: insights from magnetic andab initiocalculations
Source: Royal Society of Chemistry journal article supplement (doi:10.1039/d2cp06074d), 2023-01-01
Supplement: d2cp06074d1.pdf [file d2cp06074d1.pdf]

# **Influence of the lattice water molecules on magnetization dynamics of binuclear dysprosium(III) compounds: insights from magnetic and *ab initio* calculations**

Jiyuan Du,<sup>‡a</sup> Shilong Wei,<sup>‡b</sup> Zhijie Jiang,<sup>d</sup> Hongshan Ke,<sup>b</sup> Lin Sun,<sup>\*a</sup> Yiquan Zhang,<sup>\*c</sup> Sanping Chen<sup>\*b</sup>

*a. Henan Key Laboratory of Polyoxometalate Chemistry, College of Chemistry and Chemical Engineering, Henan University, Kaifeng, Henan 475004, China*

*b. Key Laboratory of Synthetic and Natural Functional Molecule Chemistry of Ministry of Education, College of Chemistry and Materials Science, Northwest University, Xi'an, Shaanxi 710069, China.*

*c. Jiangsu Key Laboratory for NSLSCS, School of Physical Science and Technology, Nanjing Normal University, Nanjing 210023, China.*

*d. Shaanxi Xueqian Normal University, Xian, Shanxi, 710100, China.*

<sup>‡</sup>These authors have equal contribution to this study.

\* Corresponding author: Lin Sun, Yiquan Zhang, Sanping Chen

Email address: sunlin@vip.henu.edu.cn (L. Sun); zhangyiquan@njnu.edu.cn (Y.Q. Zhang); sanpingchen@126.com (S. P. Chen)

## **Contents**

**Page S5 Materials and Instruction**

**Page S5 Thermogravimetric analysis**

**Page S6 X-Ray Powder Diffraction**

**Page S6 X-ray Crystallography**

**Page S9 Thermodynamics of the Reaction System of 1 and 2**

**Page S10 Crystal Structure**

**Page S15 Magnetic Measurements**

**Page S17 Results of *ab initio* investigation**

**Page S21 Magneto-structural correlations**

**Page S22 References**

## Graphs and Tables

**Figure S1.** TGA of **1** and **2** under dry N<sub>2</sub> atmosphere.

**Table S1.** Crystallographic Data for **1** and **2**.

**Table S2.** Selected bond lengths (Å) and angles (°) for **1** and **2**.

**Figure S2.** Experimental PXRD and calculated PXRD of **1**(a) and **2**(b).

**Figure S3.** The titration curves at 298 K of the system of S-1.

**Figure S4.** The titration curves at 298 K of the system of S-2.

**Figure S5.** The titration curves at 298 K of the system of S-3.

**Figure S6.** (a) Connection mode of 2,3'-Hppcad ligand and two coordinate modes of acetate groups: (b)  $\eta^2$ ; (c)  $\eta^1:\eta^2:\mu^2$ .

**Figure S7.** Local coordination geometry of the Dy<sup>III</sup> ion in **1** and **2**.

**Table S3.** The calculated results for Dy<sup>III</sup> ions configuration of **1** and **2** by SHAPE 2.1 software.

**Figure S8.** Packing diagram for compound **1**. The black dotted lines represent the  $\pi\cdots\pi$  interactions, and the purple dotted lines represent the hydrogen bonding interactions.

**Table S4.** Hydrogen bond geometry in compound **1**.

**Figure S9.** Packing diagram for compound **2**. The black dotted lines represent the  $\pi\cdots\pi$  interactions, and the purple dotted lines represent the hydrogen bonding interactions.

**Table S5.** Hydrogen bond geometry in compound **2**.

**Figure S10.** The distances of dinuclear Dy units in compound **1**. (a) along the *a* axis; (b) along the *b* axis; (c) along the *c* axis.

**Figure S11.** The distances of dinuclear Dy units in compound **2**. (a) along the *a* axis; (b) along the *b* axis; (c) along the *c* axis.

**Figure S12.** Hirshfeld surfaces calculation of **1**(a) and **2**(c) two-dimensional fingerprint plots in the crystal stacking of **1**(b) and **2**(d).

**Figure S13.** Individual atomic contact percentage contribution to the Hirshfeld surface for **1**(a) and **2**(b).

**Figure S14.** Magnetic hysteresis loops for **1** and **2**.

**Figure S15.** Temperature dependence of the in-phase (a) and out-of-phase (b) ac

susceptibility of **1** under 0 Oe dc field.

**Figure S16.** Temperature dependence of the in-phase (a) and out-of-phase (b) ac susceptibility of **2** under 0 Oe dc field.

**Table S8.** Relaxation fitting parameters from Least-Squares Fitting of  $\chi(\omega)$  data of **1**.

**Table S9.** Relaxation fitting parameters from Least-Squares Fitting of  $\chi(\omega)$  data of **2**.

**Figure S17.** Calculated complete structures for **1** and **2**; H atoms are omitted.

**Table S10.** Calculated energy levels ( $\text{cm}^{-1}$ ) and  $\mathbf{g}$  ( $g_x, g_y, g_z$ ) tensors of the lowest Kramers doublets (KDs) of one  $\text{Dy}^{\text{III}}$  center of **1** and **2**.

**Table S11.** Exchange energies  $E$  ( $\text{cm}^{-1}$ ) and the main values of the  $g_z$  for the lowest two exchange doublets of **1** and **2** via fitting the experimental  $\chi_M T$  versus  $T$  ( $M$  versus  $H$ ) by using POLY\_ANISO program.

**Table S12.** The angle between the *ab initio* easy axis and angle between easy axis on Dy1 and Dy1-Dy2 of compounds **1** and **2**.

**Table S13.** The angle between the *ab initio* easy axis and the axial Dy-O/N bond of compounds **1** and **2**.

**Table S14.** Natural Bond Order (NBO) charges per atoms in the ground state of **1** and **2** calculated within CASSCF.

**Table S15.** The results of preliminary ESP (in a.u.) analysis of **1** and **2**.

**Table S16.** Wave functions with definite projection of the total moment  $|m_J\rangle$  for the lowest eight KDs of individual  $\text{Dy}^{\text{III}}$  fragments for **1** and **2**.

**Table S17.** Relaxation parameters and the value of  $U_{\text{eff}}$  for nine-coordinated  $\text{Dy}_2$  compounds with  $C_{4v}$ -CSAPR geometries.

**Figure S18.** The relationship between coordination configuration and SMM behavior.

## 1. Materials and Instruction

All materials and reagents for the synthesis were commercially available and used without any further purification. FT-IR spectra were recorded in the range of 400–4000  $\text{cm}^{-1}$  using KBr pellets on an EQUINOX55 FT/IR spectrophotometer and samples were prepared as KBr pellets. Elemental analysis for C, H and N was carried out a Perkin-Elmer 2400 CHN elemental analyzer. Powder X-ray diffraction (PXRD) measurements were executed on a Rigaku RU200 diffractometer at 60 kV, 300 mA with Cu  $K\alpha$  radiation as the radiation source ( $\lambda = 1.5406 \text{ \AA}$ ) in the angular range  $\theta = 5\text{-}50^\circ$  at 25  $^\circ\text{C}$ . Thermogravimetric analysis (TGA) was conducted on a NETZSCH TG 209 thermal analyzer in the atmosphere of nitrogen at a heating rate of 10  $^\circ\text{C}/\text{min}$ . The thermodynamic parameters were measured by a TA/Nano isothermal titration calorimeter. Magnetic measurements were performed in the temperature range 2 K - 300 K with an applied field of 1000 Oe, using a Quantum Design MPMS-XL-7 SQUID magnetometer on polycrystalline samples. The freshly prepared crystalline samples wrapped into a piece of parafilm and packed in a polyethylene bag was pelletized to avoid any field induced crystal reorientation. The diamagnetic corrections for compounds were estimated using Pascal's constants. Alternating current (ac) susceptibility experiments were performed using an oscillating ac field of 2.0 Oe at ac frequencies ranging from 1 to 1000 Hz. The magnetization was measured in the field range 0 - 7 T.

## 2. Thermogravimetric analysis

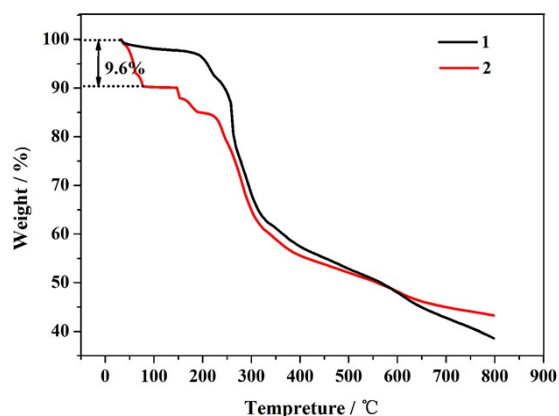

Figure S1. TGA of 1 and 2 under dry  $\text{N}_2$  atmosphere.

### 3.X-Ray Powder Diffraction.

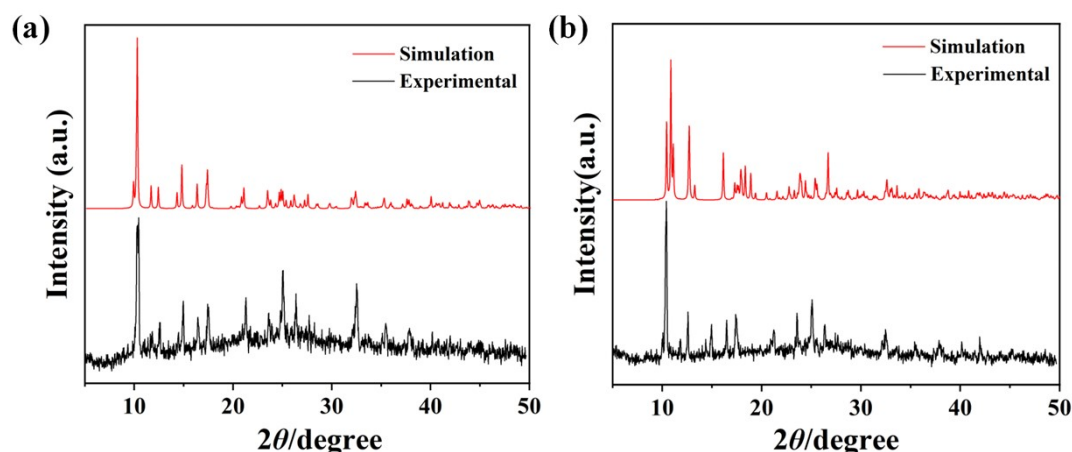

Figure S2. Experimental PXRD and calculated PXRD of **1**(a) and **2**(b).

### 4.X-ray Crystallography.

The single crystal X-ray experiment was employed using Rigaku SCX mini CCD diffractometer equipped with Mo K $\alpha$  radiation ( $\lambda = 0.71073 \text{ \AA}$  radiation) and  $\omega$  and  $\varphi$  scanning mode. The SAINT and the SADABS software were performed for absorption correction.[S5-S6] The structures of **1** and **2** were solved by the direct method and refined by full-matrix least-squares on  $F^2$  using SHELXL-97 and SHELXL-2016 programs. [S7-S8] Anisotropic displacement parameters were employed for all non-hydrogen atoms. Hydrogen atoms were assigned to their calculated positions and subsequently allowed to ride on their parent atoms. CCDC-1553638 for **1** and CCDC-1553639 for **2** can be obtained via Cambridge Crystallographic Data clicking [www.ccdc.cam.ac.uk/ data\\_request/cif](http://www.ccdc.cam.ac.uk/data_request/cif).

Table S1. Crystallographic Data for **1** and **2**.

| Compound          | <b>1</b>                                                                        | <b>2</b>                                                                        |
|-------------------|---------------------------------------------------------------------------------|---------------------------------------------------------------------------------|
| Empirical formula | C <sub>30</sub> H <sub>34</sub> Dy <sub>2</sub> N <sub>12</sub> O <sub>12</sub> | C <sub>30</sub> H <sub>46</sub> Dy <sub>2</sub> N <sub>12</sub> O <sub>18</sub> |
| Formula weight    | 1079.69                                                                         | 1187.79                                                                         |
| Temperature       | 296(2) K                                                                        | 296(2) K                                                                        |
| Crystal system    | Monoclinic                                                                      | Triclinic                                                                       |
| space group       | <i>P</i> 2 <sub>1</sub> / <i>n</i>                                              | <i>P</i> -1                                                                     |

|                                        |               |               |
|----------------------------------------|---------------|---------------|
| $a$ (Å)                                | 11.302(2)     | 9.182(5)      |
| $b$ (Å)                                | 14.387(3)     | 10.720(6)     |
| $c$ (Å)                                | 11.454(2)     | 12.462(7)     |
| $\alpha$ (°)                           | 90            | 86.385(10)    |
| $\beta$ (°)                            | 105.017(3)    | 88.762(9)     |
| $\gamma$ (°)                           | 90            | 67.666(8)     |
| $V$ (Å <sup>3</sup> )                  | 1798.8(6)     | 1132.4(11)    |
| $Z$                                    | 2             | 1             |
| $F(000)$                               | 1052          | 586           |
| Goodness-of-fit on $F^2$               | 1.004         | 1.022         |
| Final $R$ indices [ $I > 2\sigma(I)$ ] | $R1 = 0.0396$ | $R1 = 0.0614$ |
| $R$ indices (all data)                 | $R1 = 0.0682$ | $R1 = 0.0960$ |
| CCDC                                   | 1553638       | 1553639       |

**Table S2.** Selected bond lengths (Å) and angles (°) for **1** and **2**.

|                 | <b>1</b>   |                 | <b>2</b> |
|-----------------|------------|-----------------|----------|
| Dy(1)-O(3)      | 2.296(5)   | Dy(1)-O(3)      | 2.299(6) |
| Dy(1)-O(6)      | 2.342(4)   | Dy(1)-O(6)      | 2.324(8) |
| Dy(1)-O(7)      | 2.387(4)   | Dy(1)-O(7)      | 2.346(7) |
| Dy(1)-N(2)      | 2.412(6)   | Dy(1)-O(5)      | 2.396(8) |
| Dy(1)-O(2)      | 2.450(6)   | Dy(1)-O(2)      | 2.411(8) |
| Dy(1)-O(4)      | 2.451(5)   | Dy(1)-N(2)      | 2.420(9) |
| Dy(1)-O(1)      | 2.488(6)   | Dy(1)-O(1)      | 2.422(8) |
| Dy(1)-N(1)      | 2.538(6)   | Dy(1)-N(1)      | 2.581(8) |
| Dy(1)-O(5)      | 2.604(5)   | Dy(1)-O(4)      | 2.582(7) |
| O(3)-Dy(1)-O(6) | 75.09(16)  | O(3)-Dy(1)-O(6) | 82.8(3)  |
| O(3)-Dy(1)-O(7) | 145.79(16) | O(3)-Dy(1)-O(7) | 145.1(2) |
| O(5)-Dy(1)-O(7) | 78.52(16)  | O(6)-Dy(1)-O(7) | 74.0(3)  |
| O(7)-Dy(1)-N(2) | 64.67(18)  | O(3)-Dy(1)-O(5) | 85.2(3)  |
| O(6)-Dy(1)-N(2) | 87.01(18)  | O(6)-Dy(1)-O(5) | 118.4(2) |
| O(7)-Dy(1)-O(2) | 121.29(18) | O(7)-Dy(1)-O(5) | 83.4(3)  |
| N(2)-Dy(1)-O(2) | 77.18(19)  | O(3)-Dy(1)-O(3) | 81.1(3)  |
| O(3)-Dy(1)-O(4) | 95.69(17)  | O(6)-Dy(1)-O(3) | 158.0(3) |
| O(6)-Dy(1)-O(4) | 118.22(16) | O(7)-Dy(1)-O(3) | 126.9(3) |
| O(7)-Dy(1)-O(4) | 78.01(17)  | O(5)-Dy(1)-O(3) | 75.2(3)  |
| N(2)-Dy(1)-O(4) | 75.86(18)  | O(3)-Dy(1)-N(2) | 64.5(3)  |
| O(2)-Dy(1)-O(4) | 152.17(17) | O(6)-Dy(1)-N(2) | 84.4(3)  |

|                   |            |                       |          |
|-------------------|------------|-----------------------|----------|
| O(3)-Dy(1)-O(1)   | 125.36(19) | O(7)-Dy(1)-N(2)       | 136.1(3) |
| O(5)-Dy(1)-O(1)   | 82.27(19)  | O(5)-Dy(1)-N(2)       | 140.2(3) |
| O(7)-Dy(1)-O(1)   | 71.07(18)  | O(2)-Dy(1)-N(2)       | 75.2(3)  |
| N(2)-Dy(1)-O(1)   | 113.6(2)   | O(3)-Dy(1)-O(1)       | 133.8(3) |
| O(2)-Dy(1)-O(1)   | 50.59(18)  | O(6)-Dy(1)-O(1)       | 143.1(3) |
| O(4)-Dy(1)-O(1)   | 138.48(19) | O(7)-Dy(1)-O(1)       | 74.8(3)  |
| O(3)-Dy(1)-N(1)   | 128.45(18) | O(3)-Dy(1)-O(1)       | 76.6(3)  |
| O(6)-Dy(1)-N(1)   | 154.68(19) | O(2)-Dy(1)-O(4)       | 53.3(3)  |
| O(7)-Dy(1)-N(1)   | 82.33(18)  | N(2)-Dy(1)-O(4)       | 105.4(3) |
| N(2)-Dy(1)-N(1)   | 63.8(2)    | O(5)-Dy(1)-N(1)       | 125.6(3) |
| O(2)-Dy(1)-N(1)   | 88.94(19)  | O(1)-Dy(1)-N(1)       | 81.9(3)  |
| O(4)-Dy(1)-N(1)   | 73.05(17)  | O(6)-Dy(1)-N(1)       | 77.0(3)  |
| O(3)-Dy(1)-N(1)   | 75.9(2)    | O(5)-Dy(1)-N(1)       | 146.6(3) |
| O(3)-Dy(1)-O(5)   | 77.98(16)  | O(2)-Dy(1)-N(1)       | 95.3(3)  |
| O(6)-Dy(1)-O(5)   | 67.62(17)  | N(2)-Dy(1)-N(1)       | 62.2(3)  |
| O(7)-Dy(1)-O(5)   | 72.03(15)  | O(4)-Dy(1)-N(1)       | 72.3(3)  |
| N(2)-Dy(1)-O(5)   | 110.17(17) | O(3)-Dy(1)-O(5)       | 71.8(2)  |
| O(2)-Dy(1)-O(5)   | 149.20(17) | O(5)-Dy(1)-O(5)       | 67.6(3)  |
| O(4)-Dy(1)-O(5)   | 50.89(14)  | O(7)-Dy(1)-O(5)       | 75.4(2)  |
| O(1)-Dy(1)-O(5)   | 136.01(18) | O(6)-Dy(1)-O(5)       | 51.3(2)  |
| N(1)-Dy(1)-O(5)   | 121.46(17) | O(2)-Dy(1)-O(5)       | 120.6(3) |
| (i) 1-x, -y, 2-z. |            | (i) -x+1, -y+1, -z+1. |          |



## 5. Thermodynamics of the Reaction System of 1 and 2

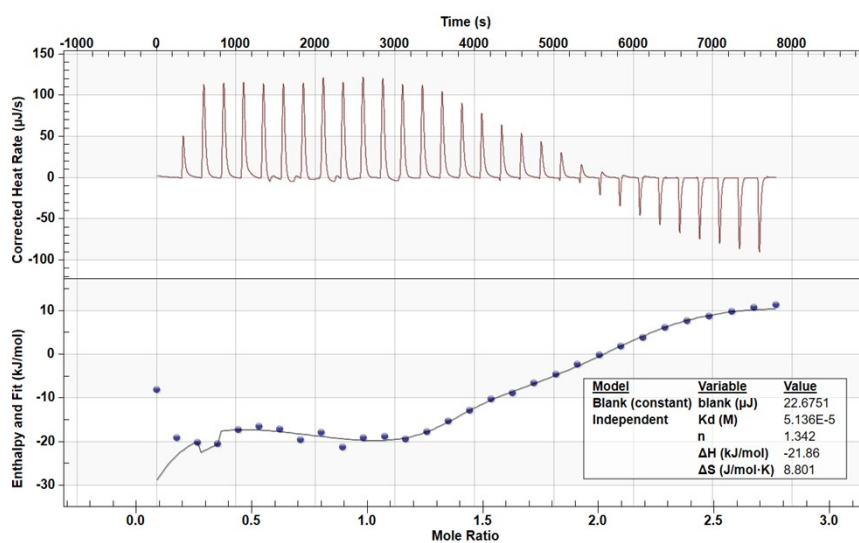

Figure S3. The titration curves at 298 K of the system of S-1.

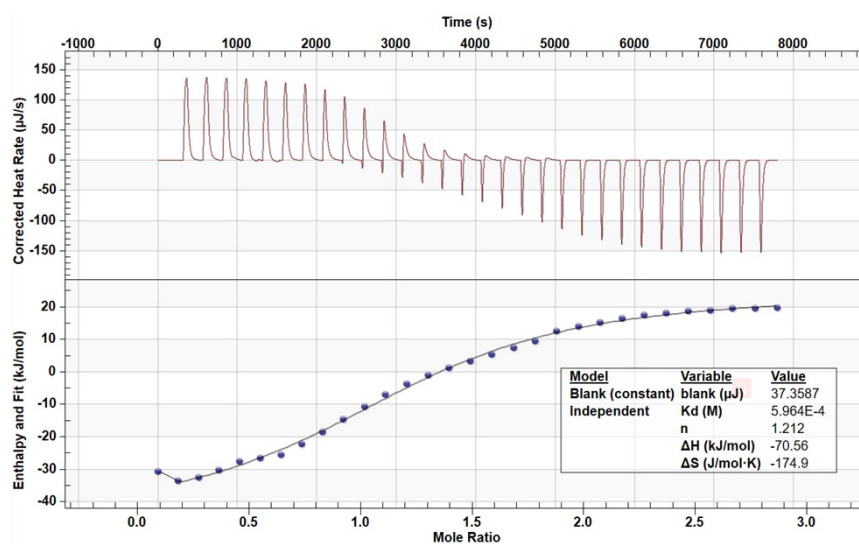

Figure S

Figure S4. The titration curves at 298 K of the system of S-2.

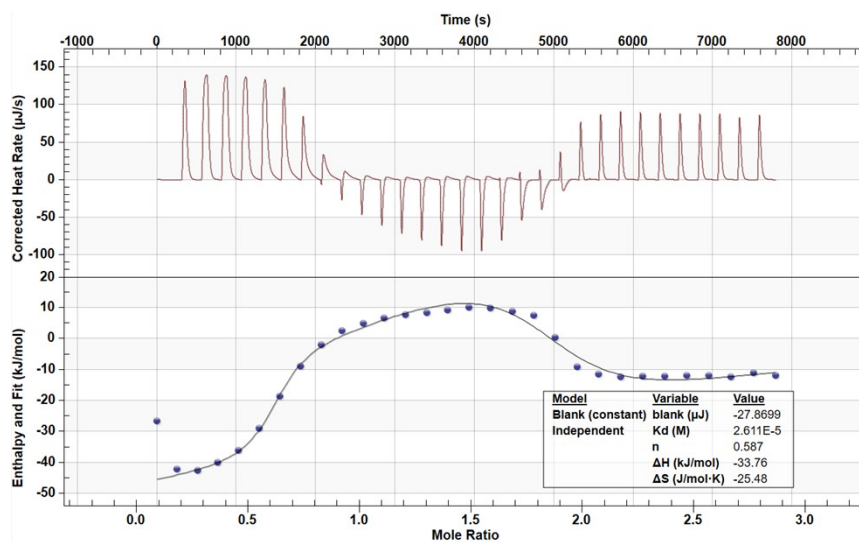

Figure S5. The titration curves at 298 K of the system of S-3.

## 6. Crystal Structure

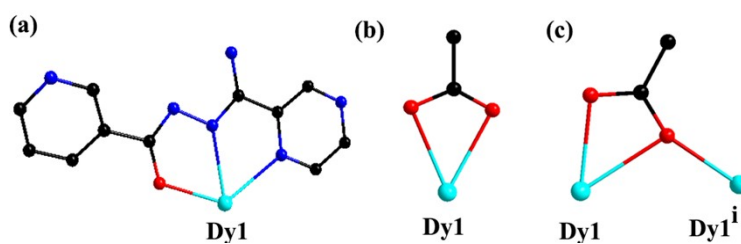

Figure S6. (a) Connection mode of 2,3'-Hppcad ligand and two coordinate modes of acetate groups: (b)  $\eta^2$ ; (c)  $\eta^1:\eta^2:\mu_2$ .

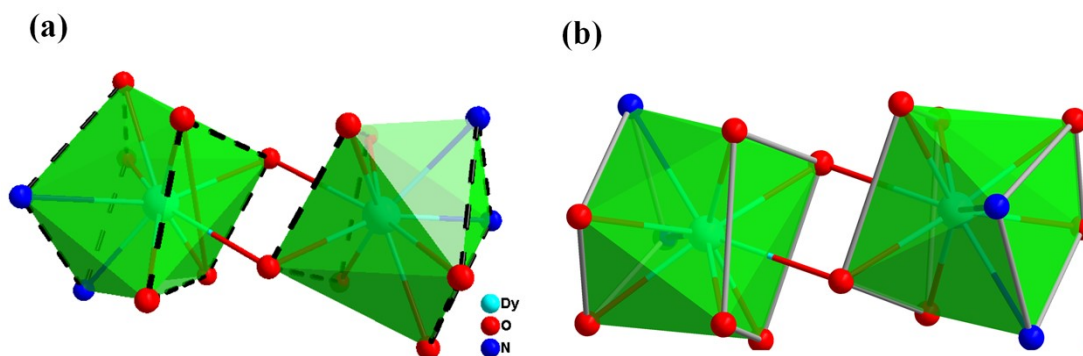

Figure S7. Local coordination geometry of the Dy<sup>III</sup> ion in 1(a) and 2(b).

**Table S3.** The calculated results for Dy<sup>III</sup> ions configuration of **1** and **2** by SHAPE 2.1 software.

| Configuration                                                  | ABOXIY, <b>1</b> | ABOXIY, <b>2</b> |
|----------------------------------------------------------------|------------------|------------------|
| Octagonal pyramid ( $C_{8v}$ )                                 | 23.069           | 23.824           |
| Heptagonal bipyramid ( $D_{7h}$ )                              | 17.943           | 16.871           |
| Johnson Triangular cupola J3 ( $C_{3v}$ )                      | 14.264           | 13.198           |
| Capped Cube J8 ( $C_{4v}$ )                                    | 9.759            | 8.934            |
| Spherical-relaxed capped Cube ( $C_{4v}$ )                     | 8.623            | 8.445            |
| Capped square antiprism J10 ( $C_{4v}$ )                       | 3.438            | 2.415            |
| <b>Spherical capped square antiprism (<math>C_{4v}</math>)</b> | <b>2.419</b>     | <b>2.015</b>     |
| Tricapped trigonal prism J51 ( $D_{3h}$ )                      | 3.816            | 3.599            |
| Spherical tricapped trigonal prism ( $D_{3h}$ )                | 3.029            | 2.774            |
| Tridiminished icosahedron J63 ( $C_{3v}$ )                     | 10.556           | 11.339           |

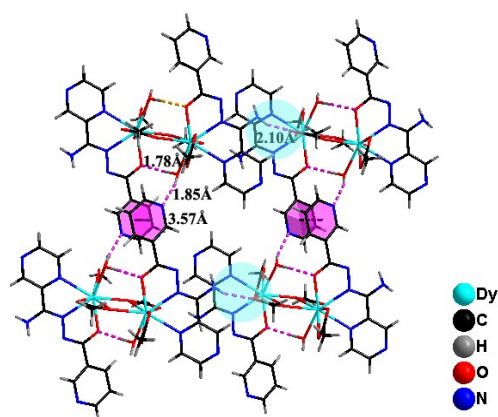

**Figure S8.** Packing diagram for compound **1**. The black dotted lines represent the  $\pi \cdots \pi$  interactions, and the purple dotted lines represent the hydrogen bonding interactions.

**Table S4.** Hydrogen bond geometry in **1**.

| D-H $\cdots$ A                          | $d_{D-H}/\text{\AA}$ | $d_{H\cdots A}/\text{\AA}$ | $d_{D\cdots A}/\text{\AA}$ | $\angle \text{DHA}^\circ$ |
|-----------------------------------------|----------------------|----------------------------|----------------------------|---------------------------|
| O(6)-H(6B) $\cdots$ N(7) <sup>ii</sup>  | 0.96                 | 1.85                       | 2.741(8)                   | 153.5                     |
| O(6)-H(6A) $\cdots$ O(5) <sup>i</sup>   | 0.96                 | 1.78                       | 2.738(7)                   | 174.4                     |
| N(4)-H(4D) $\cdots$ O(4) <sup>iii</sup> | 0.89                 | 2.10                       | 2.945(8)                   | 158.7                     |

(i) 1-x, -y, 2-z; (ii) -1+x, y, z; (iii) 1-x, 1-y, 2-z.

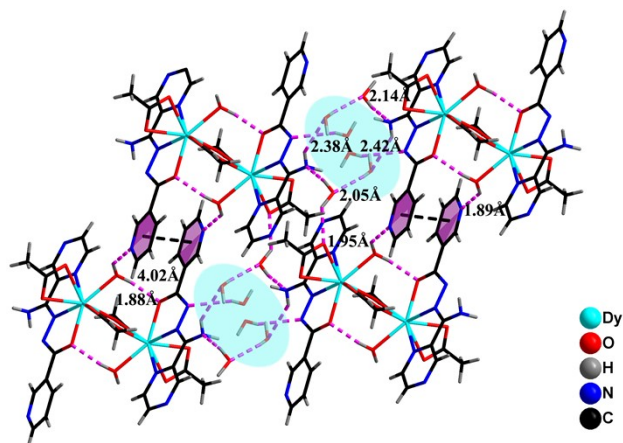**Figure S9.** Packing diagram for **2**. The black dotted lines represent the  $\pi\cdots\pi$  interactions, and the purple dotted lines represent the hydrogen bonding interactions.**Table S5.** Hydrogen bond geometry in **2**.

| D-H $\cdots$ A                           | $d_{D-H}/\text{\AA}$ | $d_{H\cdots A}/\text{\AA}$ | $d_{D\cdots A}/\text{\AA}$ | $\angle \text{DHA}^\circ$ |
|------------------------------------------|----------------------|----------------------------|----------------------------|---------------------------|
| O(8A)-H(8AB) $\cdots$ O(4)               | 1.04                 | 1.95                       | 2.789(1)                   | 135.5                     |
| O(8A)-H(8AA) $\cdots$ N(3) <sup>ii</sup> | 0.92                 | 2.14                       | 3.011(1)                   | 157.3                     |
| O(9)-H(9B) $\cdots$ O(8A)                | 0.97                 | 2.05                       | 2.910(2)                   | 146.9                     |
| O(8)-H(8B) $\cdots$ N(1) <sup>iii</sup>  | 0.95                 | 2.42                       | 2.993(2)                   | 118.9                     |
| N(3)-H(3B) $\cdots$ O(9) <sup>v</sup>    | 0.80                 | 2.38                       | 3.050(2)                   | 141.8                     |
| O(6)-H(6B) $\cdots$ O(5) <sup>i</sup>    | 0.89                 | 1.88                       | 2.734(1)                   | 160.3                     |
| O(6)-H(6A) $\cdots$ N(5) <sup>vi</sup>   | 0.99                 | 1.89                       | 2.696(1)                   | 136.8                     |

(i)  $-x+1, -y+1, -z+1$ ; (ii)  $-x+1, -y+1, -z$ ; (iii)  $x, y-1, z$ ; (iv)  $-x, -y+1, -z+1$ ; (v)  $x-1, y+1, z$ ; (vi)  $x+1, y-1, z$ .

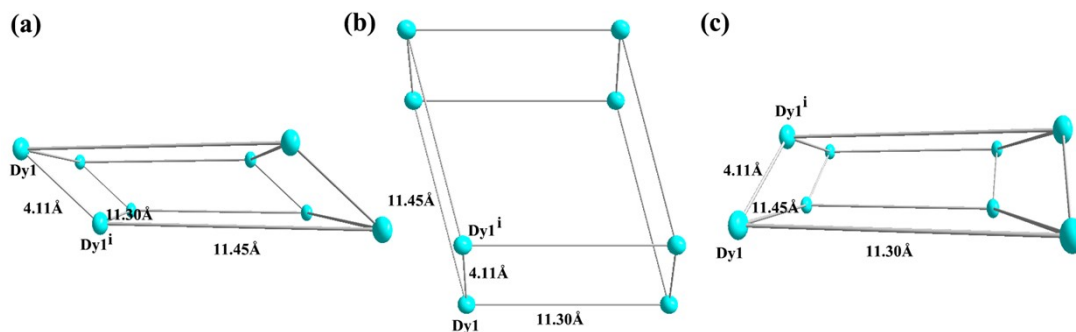

**Figure S10.** The distances of dinuclear Dy units in compound **1**. (a) along the  $a$  axis; (b) along the  $b$  axis; (c) along the  $c$  axis.

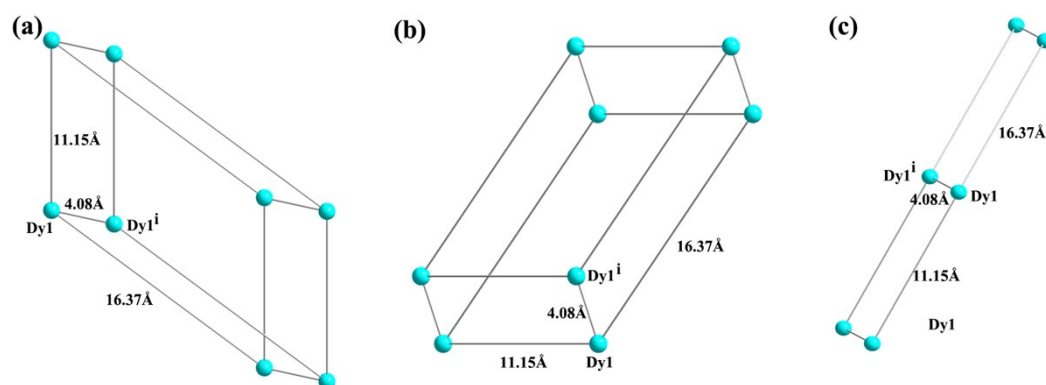

**Figure S11.** The distances of dinuclear Dy units in compound **2**. (a) along the  $a$  axis; (b) along the  $b$  axis; (c) along the  $c$  axis.

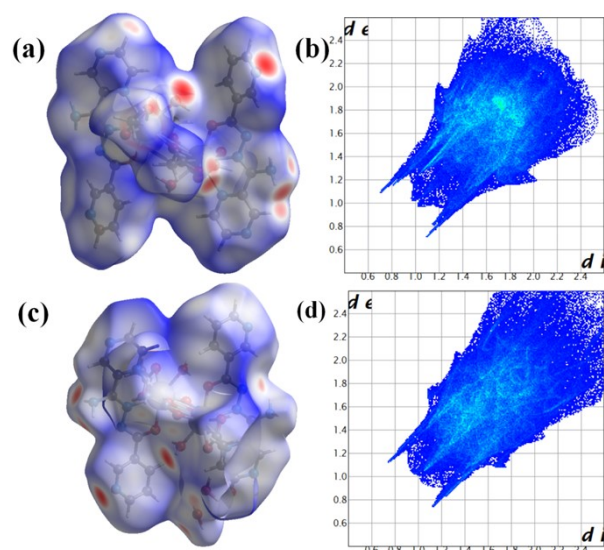

**Figure S12.** Hirshfeld surfaces calculation of **1(a)** and **2(c)** two-dimensional fingerprint plots in the crystal stacking of **1(b)** and **2(d)**.

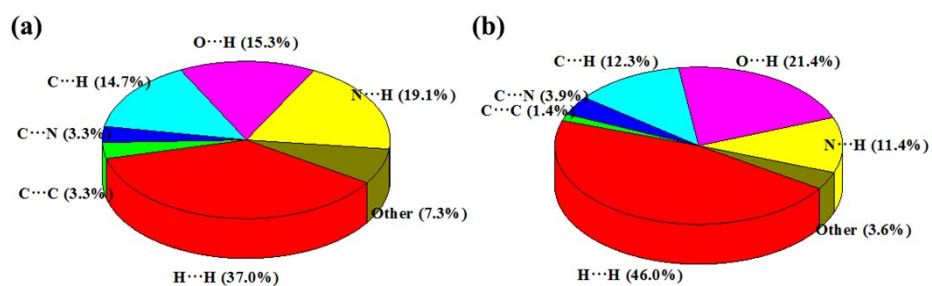

**Figure S13.** Individual atomic contact percentage contribution to the Hirshfeld surface for **1(a)** and **2(c)**.

## 7. Magnetic Measurements

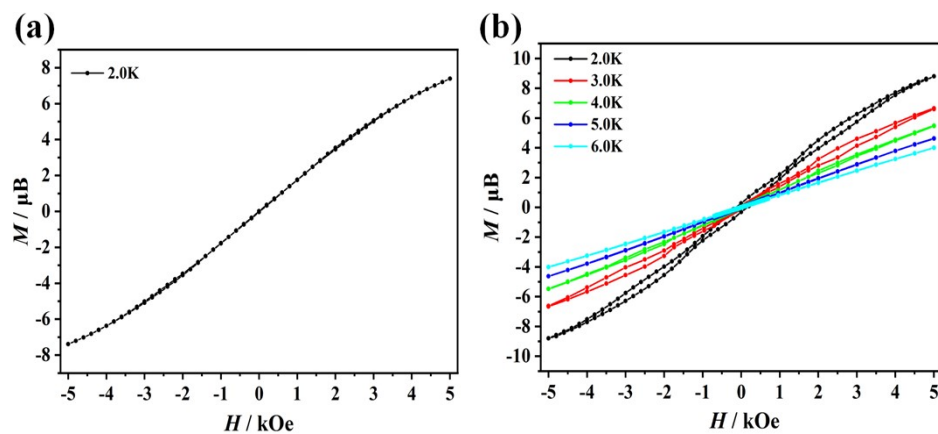

Figure S14. Magnetic hysteresis loops for **1** (a) and **2** (b) on a sweep rate of 100 Oe/min.

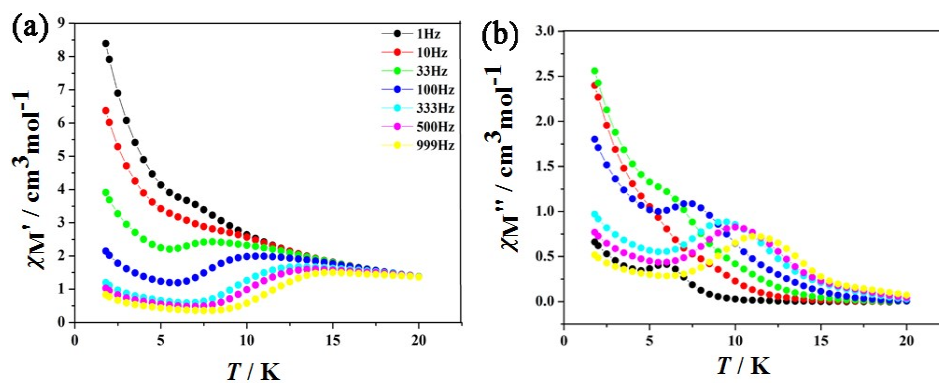

Figure S15. Temperature dependence of the in-phase (a) and out-of-phase (b) ac susceptibility of **1** under 0 Oe dc field.

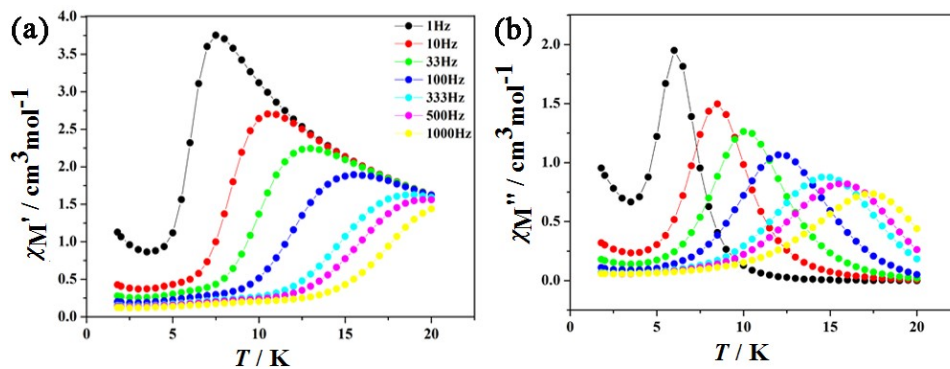

Figure S16. Temperature dependence of the in-phase (a) and out-of-phase (b) ac susceptibility of **2** under 0 Oe dc field.

**Table S8.** Relaxation fitting parameters from Least-Squares Fitting of  $\chi(\omega)$  data of **1** under 0 Oe.

| $T(\text{K})$ | $\Delta\chi_1$ ( $\text{cm}^3\text{mol}^{-1}$ ) | $\Delta\chi_2$ ( $\text{cm}^3\text{mol}^{-1}$ ) | $\alpha$ |
|---------------|-------------------------------------------------|-------------------------------------------------|----------|
| 2.0           | 8.32589                                         | 0.55286                                         | 0.26838  |
| 3.0           | 6.36581                                         | 0.40748                                         | 0.26996  |
| 4.0           | 5.11041                                         | 0.33781                                         | 0.26934  |
| 5.0           | 4.31389                                         | 0.29523                                         | 0.25942  |
| 6.0           | 3.74866                                         | 0.26741                                         | 0.22102  |
| 7.0           | 3.33305                                         | 0.22062                                         | 0.20102  |
| 8.0           | 3.25901                                         | 0.00856                                         | 0.31618  |
| 9.0           | 2.95429                                         | 0.00856                                         | 0.31618  |
| 10.0          | 2.33958                                         | 0.13573                                         | 0.30683  |
| 11.0          | 2.12825                                         | 0.10630                                         | 0.29228  |
| 12.0          | 1.95826                                         | 0.07669                                         | 0.29078  |
| 13.0          | 1.81525                                         | 0.01133                                         | 0.29635  |
| 14.0          | 1.68933                                         | 0.50996                                         | 0.25898  |
| 15.0          | 1.54574                                         | 0.85921                                         | 0.21774  |

**Table S9.** Relaxation fitting parameters from Least-Squares Fitting of  $\chi(\omega)$  data of **2** under 0 Oe.

| $T(\text{K})$ | $\Delta\chi_1$ ( $\text{cm}^3\text{mol}^{-1}$ ) | $\Delta\chi_2$ ( $\text{cm}^3\text{mol}^{-1}$ ) | $\alpha$ |
|---------------|-------------------------------------------------|-------------------------------------------------|----------|
| 5.0           | 5.10554                                         | 0.48433                                         | 0.119445 |
| 6.0           | 4.43833                                         | 0.32718                                         | 0.12359  |
| 7.0           | 4.56265                                         | 0.16554                                         | 0.21524  |
| 8.0           | 3.60348                                         | 0.17707                                         | 0.14716  |
| 9.0           | 3.17104                                         | 0.18080                                         | 0.11787  |
| 10.0          | 2.83244                                         | 0.17783                                         | 0.10131  |
| 11.0          | 2.58672                                         | 0.16928                                         | 0.09527  |
| 12.0          | 2.38050                                         | 0.15095                                         | 0.10173  |
| 13.0          | 2.18610                                         | 0.15649                                         | 0.07828  |
| 14.0          | 2.03290                                         | 0.12716                                         | 0.08752  |



|      |         |         |         |
|------|---------|---------|---------|
| 15.0 | 1.89541 | 0.11873 | 0.07785 |
| 16.0 | 1.78398 | 0.08201 | 0.08201 |
| 17.0 | 1.70422 | 0.00100 | 0.13098 |
| 18.0 | 1.59683 | 0.00001 | 0.08974 |

## 8.Results of *ab initio* investigation

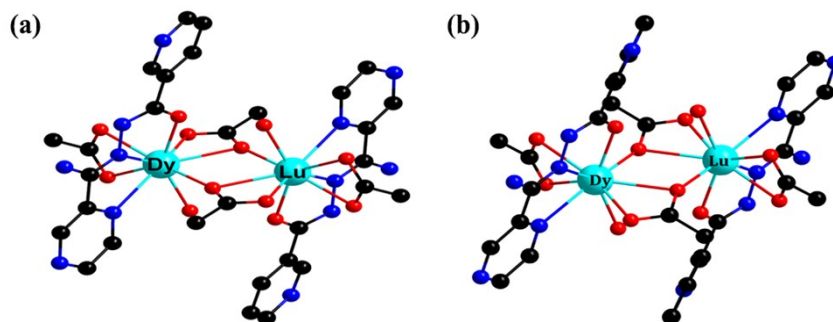

**Figure S17.** Calculated complete structures for compounds **1(a)** and **2(b)**; H atoms are omitted.

**Table S10.** Calculated energy levels ( $\text{cm}^{-1}$ ),  $g$  ( $g_x, g_y, g_z$ ) tensors of the lowest Kramers doublets (KDs) of the  $\text{Dy}^{\text{III}}$  fragments of **1** and **2**.

| <b>1(Dy1)</b> |                    |       |        | <b>2(Dy1)</b> |                    |       |        |
|---------------|--------------------|-------|--------|---------------|--------------------|-------|--------|
| KDs           | $E/\text{cm}^{-1}$ | $g$   |        | KDs           | $E/\text{cm}^{-1}$ | $g$   |        |
| 1             | 0.0                | $g_x$ | 0.012  | 1             | 0.0                | $g_x$ | 0.052  |
|               |                    | $g_y$ | 0.026  |               |                    | $g_y$ | 0.130  |
|               |                    | $g_z$ | 19.610 |               |                    | $g_z$ | 19.500 |
| 2             | 114.5              | $g_x$ | 0.485  | 2             | 87.3               | $g_x$ | 0.272  |
|               |                    | $g_y$ | 0.727  |               |                    | $g_y$ | 1.108  |
|               |                    | $g_z$ | 16.790 |               |                    | $g_z$ | 17.812 |
| 3             | 160.8              | $g_x$ | 0.051  | 3             | 124.3              | $g_x$ | 0.516  |
|               |                    | $g_y$ | 1.129  |               |                    | $g_y$ | 1.496  |
|               |                    | $g_z$ | 13.153 |               |                    | $g_z$ | 15.383 |
| 4             | 186.2              | $g_x$ | 1.128  | 4             | 155.4              | $g_x$ | 2.875  |
|               |                    | $g_y$ | 2.474  |               |                    | $g_y$ | 5.987  |
|               |                    | $g_z$ | 14.991 |               |                    | $g_z$ | 10.788 |
| 5             | 209.6              | $g_x$ | 3.349  | 5             | 192.9              | $g_x$ | 1.948  |
|               |                    | $g_y$ | 4.589  |               |                    | $g_y$ | 3.601  |
|               |                    | $g_z$ | 8.054  |               |                    | $g_z$ | 11.122 |

|   |       |       |        |   |       |       |        |
|---|-------|-------|--------|---|-------|-------|--------|
| 6 | 279.7 | $g_x$ | 2.261  | 6 | 237.5 | $g_x$ | 0.700  |
|   |       | $g_y$ | 3.312  |   |       | $g_y$ | 0.806  |
|   |       | $g_z$ | 10.779 |   |       | $g_z$ | 17.914 |
| 7 | 336.8 | $g_x$ | 0.690  | 7 | 310.6 | $g_x$ | 0.603  |
|   |       | $g_y$ | 1.332  |   |       | $g_y$ | 0.649  |
|   |       | $g_z$ | 15.102 |   |       | $g_z$ | 15.849 |
| 8 | 447.3 | $g_x$ | 0.135  | 8 | 446.1 | $g_x$ | 0.081  |
|   |       | $g_y$ | 0.155  |   |       | $g_y$ | 0.139  |
|   |       | $g_z$ | 19.134 |   |       | $g_z$ | 18.781 |

**Table S11.** Exchange energies  $E$  ( $\text{cm}^{-1}$ ) and the main values of the  $g_z$  for the lowest two exchange doublets of **1** and **2** via fitting the experimental  $\chi_M T$  versus  $T$  ( $M$  versus  $H$ ) by using POLY\_ANISO program.

|              | Exchange doublets | <b>1</b>           |        | <b>2</b>           |        |
|--------------|-------------------|--------------------|--------|--------------------|--------|
|              |                   | $E/\text{cm}^{-1}$ | $g_z$  | $E/\text{cm}^{-1}$ | $g_z$  |
| $\chi_M T-T$ | 1                 | 0.000000000000     | 0.000  | 0.000000000000     | 0.000  |
|              |                   | 0.000100655726     |        | 0.000011572486     |        |
|              | 2                 | 0.888897492564     | 38.993 | 0.365641436088     | 39.218 |
|              |                   | 0.889025582364     |        | 0.365654509137     |        |

|       | Exchange doublets | <b>1</b>           |        | <b>2</b>           |        |
|-------|-------------------|--------------------|--------|--------------------|--------|
|       |                   | $E/\text{cm}^{-1}$ | $g_z$  | $E/\text{cm}^{-1}$ | $g_z$  |
| $M-H$ | 1                 | 0.000000000000     | 0.000  | 0.000000000000     | 0.000  |
|       |                   | 0.000328720866     |        | 0.000005376189     |        |
|       | 2                 | 0.196091489653     | 38.969 | 0.715954235118     | 39.209 |
|       |                   | 0.196431252064     |        | 0.715961563096     |        |

**Table S12.** The angle between the *ab initio* easy axis and angle between easy axis on Dy1 and Dy1-Dy2 of compounds **1** and **2**.

| Compound | Angle between two easy axis | Angle between easy axis on Dy1 and Dy1-Dy1 <sup>i</sup> |
|----------|-----------------------------|---------------------------------------------------------|
| <b>1</b> | 180                         | 80.009                                                  |
| <b>2</b> | 180                         | 109.017                                                 |

**Table S13.** The angle between the *ab initio* easy axis and the axial Dy-O/N bond of compounds **1** and **2**.

| Compound | $\theta_1$ (O3) | $\theta_2$ (N2) | $\theta_3$ (O1) | $\theta_4$ (O7) | Average |
|----------|-----------------|-----------------|-----------------|-----------------|---------|
| <b>1</b> | 20.602          | 45.318          | 38.957          | 36.046          | 35.231  |
| <b>2</b> | 31.317          | 33.409          | 55.596          | 6.993           | 31.829  |

**Table S14.** Natural Bond Order (NBO) charges per atoms in the ground state of **1** and **2** calculated within CASSCF.

| <b>1</b>                    |               | <b>2</b>                    |               |
|-----------------------------|---------------|-----------------------------|---------------|
| Dy1                         | 2.514         | Dy1                         | 2.517         |
| N2                          | -0.356        | N2                          | -0.300        |
| O1                          | -0.725        | O1                          | -0.799        |
| O7                          | -0.767        | O7                          | <b>-0.782</b> |
| O3                          | <b>-0.831</b> | O3                          | -0.820        |
| <b>Average (axial)</b>      | <b>-0.670</b> | <b>Average (axial)</b>      | <b>-0.675</b> |
| O4                          | -0.735        | O4                          | -0.681        |
| O5                          | -0.713        | O5                          | -0.799        |
| O6                          | -0.778        | O6                          | -0.795        |
| N1                          | -0.294        | N1                          | -0.298        |
| O2                          | -0.774        | O2                          | -0.740        |
| <b>Average (equatorial)</b> | <b>-0.659</b> | <b>Average (equatorial)</b> | <b>-0.663</b> |
| (i) 1-x, -y, 2-z.           |               | (i) -x+1, -y+1, -z+1.       |               |

**Table S15.** The results of preliminary ESP (in a.u.) analysis of **1** and **2**.

|                  | <b>1</b>           | <b>2</b>           |
|------------------|--------------------|--------------------|
| ESP(equ)/ESP(ax) | <b>0.933305578</b> | <b>0.929298141</b> |
| ESP(ax)          | -0.255712199       | -0.262567533       |
| ESP(ax_N)        | -0.133373938       | -0.111760563       |
| ESP(ax_O)        | -0.29649162        | -0.312836522       |
| ESP(equ)         | -0.238657622       | -0.24400352        |
| ESP(equ_N)       | -0.101122237       | -0.09971031        |
| ESP(equ_O)       | -0.273041468       | -0.280076822       |

**Table S16.** Wave functions with definite projection of the total moment  $|m_J\rangle$  for the lowest eight KDs of individual Dy<sup>III</sup> fragments for **1** and **2**.

|               | $E/\text{cm}^{-1}$ | wave functions                                                                                                                |
|---------------|--------------------|-------------------------------------------------------------------------------------------------------------------------------|
| <b>1(Dy1)</b> | 0.0                | 96.5% $ 15/2\rangle$                                                                                                          |
|               | 114.5              | 40.6% $ 13/2\rangle$ +22.6% $ 11/2\rangle$ +11.3% $ 9/2\rangle$ +7.0% $ 3/2\rangle$ +6.2% $ 5/2\rangle$                       |
|               | 160.8              | 31.1% $ 13/2\rangle$ +18.2% $ 5/2\rangle$ +16.0% $ 7/2\rangle$ +15.1% $ 3/2\rangle$ +11.9% $ 1/2\rangle$                      |
|               | 186.2              | 25.6% $ 9/2\rangle$ +17.6% $ 11/2\rangle$ +13.6% $ 7/2\rangle$ +12.2% $ 5/2\rangle$ +11.5% $ 1/2\rangle$ +9.5% $ 3/2\rangle$  |
|               | 209.6              | 24.1% $ 7/2\rangle$ +16.0% $ 9/2\rangle$ +15.2% $ 11/2\rangle$ +14.0% $ 1/2\rangle$ +12.9% $ 13/2\rangle$ +9.9% $ 3/2\rangle$ |
|               | 279.7              | 26.2% $ 11/2\rangle$ +22.5% $ 5/2\rangle$ +15.3% $ 3/2\rangle$ +13.8% $ 9/2\rangle$ +10.2% $ 7/2\rangle$                      |
|               | 336.8              | 23.0% $ 9/2\rangle$ +21.8% $ 7/2\rangle$ +16.3% $ 5/2\rangle$ +14.1% $ 3/2\rangle$ +11.8% $ 11/2\rangle$ +10.3% $ 1/2\rangle$ |
|               | 447.3              | 37.9% $ 1/2\rangle$ +29.1% $ 3/2\rangle$ +17.1% $ 5/2\rangle$ +8.8% $ 7/2\rangle$                                             |
| <b>2(Dy1)</b> | 0.0                | 95.5% $ 15/2\rangle$                                                                                                          |
|               | 87.3               | 22.7% $ 7/2\rangle$ +17.6% $ 5/2\rangle$ +15.7% $ 11/2\rangle$ +14.0% $ 9/2\rangle$ +12.4% $ 3/2\rangle$ +8.6% $ 1/2\rangle$  |
|               | 124.3              | 67.6% $ 13/2\rangle$ +11.1% $ 11/2\rangle$ +10.4% $ 9/2\rangle$                                                               |
|               | 155.4              | 23.2% $ 7/2\rangle$ +21.5% $ 11/2\rangle$ +15.2% $ 9/2\rangle$ +12.6% $ 3/2\rangle$ +11.7% $ 1/2\rangle$ +9.8% $ 13/2\rangle$ |
|               | 192.9              | 25.6% $ 5/2\rangle$ +23.7% $ 3/2\rangle$ +14.9% $ 9/2\rangle$ +11.8% $ 1/2\rangle$ +11.3% $ 7/2\rangle$                       |
|               | 237.5              | 34.5% $ 11/2\rangle$ +25.1% $ 9/2\rangle$ +13.3% $ 7/2\rangle$ +10.7% $ 1/2\rangle$ +9.7% $ 13/2\rangle$                      |
|               | 310.6              | 27.8% $ 1/2\rangle$ +17.3% $ 3/2\rangle$ +16.6% $ 7/2\rangle$ +15.5% $ 5/2\rangle$ +13.6% $ 9/2\rangle$                       |
|               | 446.1              | 30.3% $ 3/2\rangle$ +28.0% $ 1/2\rangle$ +23.8% $ 5/2\rangle$ +12.5% $ 7/2\rangle$                                            |

## 9. Magneto-structural correlations

**Table S17.** Relaxation parameters and the value of  $U_{eff}$  for nine-coordinated Dy<sub>2</sub> compounds with C<sub>4v</sub>-CSAPR geometries.

|                                                                                                                                                                       | 9/CSAPR-9/<br>CShM's values <sup>a</sup> | Bond distance/ Å |        | The slow relaxation process |                          |              | Ref.            |
|-----------------------------------------------------------------------------------------------------------------------------------------------------------------------|------------------------------------------|------------------|--------|-----------------------------|--------------------------|--------------|-----------------|
|                                                                                                                                                                       |                                          | Dy-Dy            | Dy-Dy  | DC<br>field/Oe              | $\tau_0$ /s              | $U_{eff}$ /K |                 |
|                                                                                                                                                                       |                                          | Intra            | Inter  |                             |                          |              |                 |
| [Dy <sub>2</sub> (2,3'-ppcad) <sub>2</sub> (C <sub>2</sub> H <sub>3</sub> O <sub>2</sub> ) <sub>4</sub> (H <sub>2</sub> O) <sub>2</sub> ] (1)                         | 2.419                                    | 4.11             | 11.30  | 0                           | 3.49 × 10 <sup>-8</sup>  | 103.43       | In this<br>work |
| [Dy <sub>2</sub> (2,3'-ppcad) <sub>2</sub> (C <sub>2</sub> H <sub>3</sub> O <sub>2</sub> ) <sub>4</sub> (H <sub>2</sub> O) <sub>2</sub> ]·6H <sub>2</sub> O           | 2.015                                    | 4.08             | 11.15  | 0                           | 4.01 × 10 <sup>-13</sup> | 386.48       |                 |
| [Dy <sub>2</sub> (hfac) <sub>6</sub> (H <sub>2</sub> O) <sub>2</sub> (L)] (3)                                                                                         | 0.516                                    | 5.963            | 17.497 | 0                           | 2.4 × 10 <sup>-6</sup>   | 15.4         | S7              |
| [Dy <sub>2</sub> L(H <sub>2</sub> L)(teaH <sub>2</sub> (o-<br>vanillin)(H <sub>2</sub> O))(ClO <sub>4</sub> ) <sub>2</sub> ·2CH <sub>3</sub> OH·H <sub>2</sub> O] (4) | 1.283                                    | 3.549            | -      | 0                           | 1.7 × 10 <sup>-4</sup>   | 1.4          | S8              |
|                                                                                                                                                                       | 1.154                                    |                  |        |                             |                          |              |                 |
| [Dy <sub>2</sub> L <sub>2</sub> (OAc) <sub>4</sub> (MeOH) <sub>2</sub> ]·2MeOH (5)                                                                                    | 1.197                                    | 4.074            | -      | 0                           | 6.4 × 10 <sup>-7</sup>   | 39.1         | S9              |
| [Dy <sub>2</sub> (Mq) <sub>4</sub> (NO <sub>3</sub> ) <sub>6</sub> ] (6)                                                                                              | 2.401                                    | 3.914            | 9.598  | 0                           | 5.44 × 10 <sup>-6</sup>  | 40.01        | S10             |
| [Dy <sub>2</sub> (HL) <sub>2</sub> (NO <sub>3</sub> ) <sub>4</sub> ] (7)                                                                                              | 2.948                                    | 3.709            | 7.040  | No peaks                    | -                        | -            | S11             |
| [Dy <sub>2</sub> (H <sub>2</sub> L) <sub>2</sub> (μ-piv) <sub>2</sub> (piv) <sub>2</sub> ]·2CHCl <sub>3</sub> (8)                                                     | 0.968                                    | 3.633            | -      | 0                           | 8.81 × 10 <sup>-5</sup>  | 8.96         | S12             |
|                                                                                                                                                                       |                                          |                  |        | 0                           | 1.48 × 10 <sup>-6</sup>  | 35.5         |                 |
| [Dy <sub>2</sub> (H <sub>3</sub> L) <sub>2</sub> (PhCOO) <sub>4</sub> ]·4H <sub>2</sub> O (9)                                                                         | 1.408                                    | 3.695            | > 7.6  | 0                           | 1.31 × 10 <sup>-7</sup>  | 42.7         | S13             |
| [Dy <sub>2</sub> (μ <sub>2</sub> -anthc) <sub>4</sub> (anthc) <sub>2</sub> (2,2'-bpy) <sub>2</sub> ] (10)                                                             | 2.300                                    | 3.949            | 9.318  | 0                           | 3.2 × 10 <sup>-8</sup>   | 51.2         | S14             |
| [Dy <sub>2</sub> (μ <sub>2</sub> -anthc) <sub>4</sub> (anthc) <sub>2</sub> (1,10-phen) <sub>2</sub> ] (11)                                                            | 1.740                                    | 3.918            | 9.798  | 0                           | 4.6 × 10 <sup>-9</sup>   | 49.4         |                 |
| [Dy <sub>2</sub> (μ <sub>2</sub> -anthc) <sub>4</sub> (anthc) <sub>2</sub> L <sub>2</sub> ] (12)                                                                      | 1.878                                    | 3.922            | 11.748 | 0                           | 3.4 × 10 <sup>-8</sup>   | 31.6         |                 |
| [Dy <sub>2</sub> (ovph) <sub>2</sub> Cl <sub>2</sub> (H <sub>2</sub> O) <sub>3</sub> (EtOH)] (13)                                                                     | 1.221                                    | 3.954            | 6.256  | 0                           | 1.36 × 10 <sup>-7</sup>  | 110          | S15             |
| [Dy <sub>2</sub> (bzhdep-2H)(NO <sub>3</sub> ) <sub>4</sub> (DMF) <sub>4</sub> ] (14)                                                                                 | 2.319                                    | -                | 7.882  | 1000                        | 2.6 × 10 <sup>-6</sup>   | 29.5         | S16             |
| [Dy(L <sub>1</sub> ) <sub>3</sub> (DMSO)(H <sub>2</sub> O)] <sub>2</sub> (15)                                                                                         | 2.296                                    | 4.157            | 9.533  | 2000                        | -                        | -            | S17             |
| {[Dy <sub>2</sub> (PDOA) <sub>3</sub> (H <sub>2</sub> O) <sub>6</sub> ]·2H <sub>2</sub> O} <sub>n</sub> (16)                                                          | 1.742                                    | 6.407            | 13.921 | 2000                        | 6.3 × 10 <sup>-10</sup>  | 71.6         | S18             |
| [Dy <sub>2</sub> (PDOA) <sub>3</sub> (H <sub>2</sub> O) <sub>6</sub> ]·3.5H <sub>2</sub> O (17)                                                                       | 1.186                                    | 6.130            | 12.388 | 2000                        | 2.4 × 10 <sup>-11</sup>  | 97.8         |                 |
| [Dy <sub>2</sub> Lz <sub>2</sub> (OAc) <sub>6</sub> ]·2CH <sub>3</sub> OH (18)                                                                                        | 1.677                                    | 3.980            | -      | 900                         | 3.8 × 10 <sup>-7</sup>   | 44.0         | S19             |
| Dy <sub>2</sub> (L <sup>1</sup> ) <sub>2</sub> (NO <sub>3</sub> ) <sub>2</sub> (OAc) <sub>2</sub> (CH <sub>3</sub> OH) <sub>2</sub> (19)                              | 2.139                                    | 4.092            | -      | 0                           | 1.7 × 10 <sup>-5</sup>   | 19.6         | S20             |
| {[Dy <sub>2</sub> (β-ala) <sub>6</sub> (H <sub>2</sub> O) <sub>4</sub> ](ClO <sub>4</sub> ) <sub>6</sub> ·H <sub>2</sub> O} <sub>n</sub> (20)                         | 1.186                                    | 3.984            | -      | 1000                        | 4.6 × 10 <sup>-9</sup>   | 29.4         | S21             |
| [Dy <sub>2</sub> (L <sup>2</sup> ) <sub>2</sub> (NO <sub>3</sub> ) <sub>4</sub> ] (21)                                                                                | 5.250                                    | -                | -      | 0                           | 2.0 × 10 <sup>-4</sup>   | 2.66         | S22             |
|                                                                                                                                                                       |                                          |                  |        | 1500                        | 8.56 × 10 <sup>-4</sup>  | 8.43         |                 |
| [Dy <sub>2</sub> (hfac) <sub>6</sub> (H <sub>2</sub> O) <sub>2</sub> (Q)] (22)                                                                                        | 0.178                                    | 21.656           | 6.071  | 0                           | 7.6 × 10 <sup>-7</sup>   | 18.3         | S23             |
| [Dy <sub>2</sub> (2,4'-pcad) <sub>2</sub> (C <sub>2</sub> H <sub>3</sub> O <sub>2</sub> ) <sub>4</sub> (H <sub>2</sub> O) <sub>2</sub> ]·4H <sub>2</sub> O (23)       | 2.336                                    | 4.17             | 11.00  | 0                           | 5.7 × 10 <sup>-6</sup>   | 53.5         | S24             |
| [Dy <sub>2</sub> (2,3'-pcad) <sub>2</sub> (C <sub>2</sub> H <sub>3</sub> O <sub>2</sub> ) <sub>4</sub> (H <sub>2</sub> O) <sub>2</sub> ] (24)                         | 2.167                                    | 4.13             | 11.39  | 0                           | 3.8 × 10 <sup>-7</sup>   | 132.6        |                 |

<sup>a</sup> CShM's values of the Dy<sup>III</sup> ion in comparison with all of the reference standard nine-coordinate polyhedrons were calculated using the SHAPE program. Abbreviation: hfac- = 1,1,1,5,5,5-hexafluoroacetylacetonate anion ; L = 4,4',7,7'-tetra-tert-butyl-2,2'-bi-1,3-benzodithiole-5,5',6,6'-tetrone ; teaH<sub>3</sub> = triethanolamine ; HL = *N,N*-bis(3-methoxysalicylidene)-1,2-cyclohexanediamine ; HL = (E)-*N'*-(2-hydroxybenzylidene)-2-mercaptocotinohydrazide ; Mq = 8-hydroxy-2-methylquinoline ; H<sub>2</sub>L<sub>1</sub> = 2-[(2-hydroxy-ethyl)-pyridin-2-ylmethylamino]-ethanol ; H<sub>3</sub>L = 2,2'-(2-hydroxy-3-methoxy-5-methylbenzylazanediyl)diethanol ; H<sub>4</sub>L = 1,5-Bis(2-hydroxy-3-methoxybenzylidene)carbonohydrazide ; anthc- = 9-anthracenecarboxylate ; HL = 2,2'-bipyridyl, 1,10-phenanthroline, and 4,7-dimethyl-1,10-phenanthroline ; H<sub>2</sub>ovph = pyridine-2-carboxylic acid [(2-hydroxy-3-methoxyphenyl)methylene] hydrazide ; bzhdep = Pyrazine-2,

5-diylbis(ethan-1-yl-1-ylidene)di(benzohydrazide) ; HL1 = 2-methoxycinnamic acid ; H<sub>2</sub>PDOA = 1,2-phenylenedioxydiacetic acid ; Lz = 6-pyridin-2-yl-[1,3,5]triazine-2,4-diamine ; HL1 = ((E)-1-(((1-methyl-1H-benzo[d]imidazol-2-yl)methylene)amino)naphthalen-2-ol) ;  $\beta$ -ala =  $\beta$ -alanine ; HL<sub>2</sub> = 2-(pyridin-2-yl)hexahydropyrimidin-5-ol ; hfac = 1,1,1,5,5,5-hexafluoroacetylacetonate ; Q = 2,2'-cyclohexa-2,5-diene-1,4-diylidenebis(4,7-di-tert-butyl-1,3-benzodithiole-5,6-dione) ; 2,4'-Hpcad = N<sup>3</sup>-(2-pyridoyl)-4-pyridinecarboxamidrazone ; 2,3'-Hpcad = N<sup>3</sup>-(2-pyridoyl)-3-pyridinecarboxamidrazone.

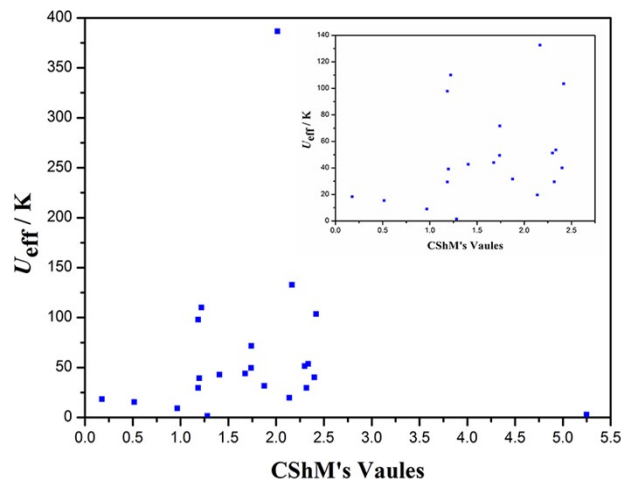

**Figure S18.** The relationship between coordination configuration and SMMs behavior.

## References

- [S1] M. E. Lines, *J. Chem. Phys.*, 1971, **55**, 2977-2984.
- [S2] K. C. Mondal, A. Sundt, Y. H. Lan, G. E. Kostakis, O. Waldmann, L. Ungur, L. F. Chibotaru, C. E. Anson and A. K. Powell, *Angew. Chem. Int. Ed.*, 2012, **51**, 7550.
- [S3] S. K. Langley, D. P. Wielechowski, V. Vieru, N. F. Chilton, B. Moubaraki, B. F. Abrahams, L. F. Chibotaru and K. S. Murray, *Angew. Chem. Int. Ed.*, 2013, **52**, 12014.
- [S4] L. F. Chibotaru, L. Ungur, and A. Soncini, *Angew. Chem. Int. Ed.*, 2008, **47**, 4126.
- [S5] L. Ungur, W. Van den Heuvel and L.F. Chibotaru, *New J. Chem.*, 2009, **33**, 1224.
- [S6] L. F. Chibotaru, L. Ungur, C. Aronica, H. Elmol, G. Pilet and D. Luneau, *J. Am. Chem. Soc.*, 2008, **130**, 12445.
- [S7] F. Pointillart, S. Klementieva, V. Kuropatov, Y. Le Gal, S. Golhen, O. Cadot, V. Cherkasov and L. Ouahab, *Chem. Commun.*, 2012, **48**, 714-716.
- [S8] L. Zhang, P. Zhang, L. Zhao, S. Y. Lin, S. F. Xue, J. K. Tang and Z. L. Liu, *Eur. J. Inorg. Chem.*, 2013, **8**, 1351-1357.
- [S9] H. Zhang, S. Y. Lin, S. Xue, C. Wang and J. K. Tang, *Dalton Trans.*, 2014, **43**, 6262-6268.
- [S10] F. Yang, Q. Zhou, G. Zeng, G. H. Li, L. Gao, Z. Shi and S. H. Feng, *Dalton Trans.*, 2014, **43**, 1238-1245.

- [S11] Y. Peng, V. Mereacre, A. Baniodeh, Y. Lan, M. Schlageter, G. E. Kostakis and A. K. Powell, *Inorg. Chem.*, 2016, **55**, 68-74.
- [S12] P. Bag, C. K. Rastogi, S. Biswas, S. Sivakumar, V. Mereacre and V. Chandrasekhar, *Dalton Trans.*, 2015, **44**, 4328-4340.
- [S13] H. S. Ke, S. Zhang, X. Li, Q. Wei, G. Xie, W. Y. Wang and S. P. Chen, *Dalton Trans.*, 2015, **44**, 21025-21031.
- [S14] Y. L. Wang, C. B. Han, Y. Q. Zhang, Q. Y. Liu, C. M. Liu and S. G. Yin, *Inorg. Chem.*, 2016, **55**, 5578-5584.
- [S15] Y. Jiang, G. Brunet, R. J. Holmberg, F. Habib, I. Korobkov and M. Murugesu, *Dalton Trans.*, 2016, **45**, 16709-16715.
- [S16] W. Huang, F. X. Shen, S. Q. Wu, L. Liu, D. Wu, Z. Zheng, J. Xu, M. Zhang, X. C. Huang, J. Jiang, F. Pan, Y. Li, K. Zhu and O. Sato, *Inorg. Chem.*, 2016, **55**, 5476-5484.
- [S17] O. Khalfaoui, A. Beghidja, J. Long, A. Boussadia, C. Beghidja, Y. Guari and J. Larionova, *Dalton Trans.*, 2017, **46**, 3943-3952.
- [S18] R. Boca, M. Stolarova, L. R. Falvello, M. Tomas, J. Titis and J. Cernak, *Dalton Trans.*, 2017, **46**, 5344-5351.
- [S19] M. Guo, Y. H. Xu, J. F. Wu, L. Zhao and J. K. Tang, *Dalton Trans.*, 2017, **46**, 8252-8258.
- [S20] H. L. Wang, J. M. Peng, Z. H. Zhu, K. Q. Mo, X. F. Ma, B. Li, H. H. Zou and F. P. Liang, *Cryst. Growth Des.*, 2019, **19**, 5369-5375.
- [S21] M. Orts-Arroyo, I. Castro, F. Lloret and J. Martinez-Lillo, *Dalton Trans.*, 2020, **49**, 9155-9163.
- [S22] Z. H. Zhu, H. L. Wang, S. Yu, X. X. Fu, H. H. Zou, Z. Chen and F. P. Liang, *Appl. Organometal Chem.*, 2020, **34**, e5622.
- [S23] F. Pointillart, J. Flores Gonzalez, V. Montigaud, L. Tesi, V. Cherkasov, B. Le Guennic, O. Cador, L. Ouahab, R. Sessoli and V. Kuropatov, *Inorg. Chem. Front.*, 2020, **7**, 2322-2334.
- [S24] L. Sun, S. L. Wei, J. Zhang, W. Y. Wang, S. P. Chen, Y. Q. Zhang, Q. Wei, G. Xie, and S. L. Gao, *J. Mater. Chem. C*, 2017, **5**, 9488-9495.
